# Supplementary material for: Natural History of Treated Subarachnoid Neurocysticercosis
Source: PubMed Central journal article supplement (PMC6947806; doi:10.4269/ajtmh.19-0436), 2019-10-21
Supplement: tpmd190436.SD2.pdf [file tpmd190436.SD2.pdf]

- Enrolled NIH
- ▣ Albendazole
- ▲ Praziquantel
- ◆ Steroids
- ▢ Methotrexate
- ★ Etanercept
- CSF WBC
- △ Cestode antigen CSF

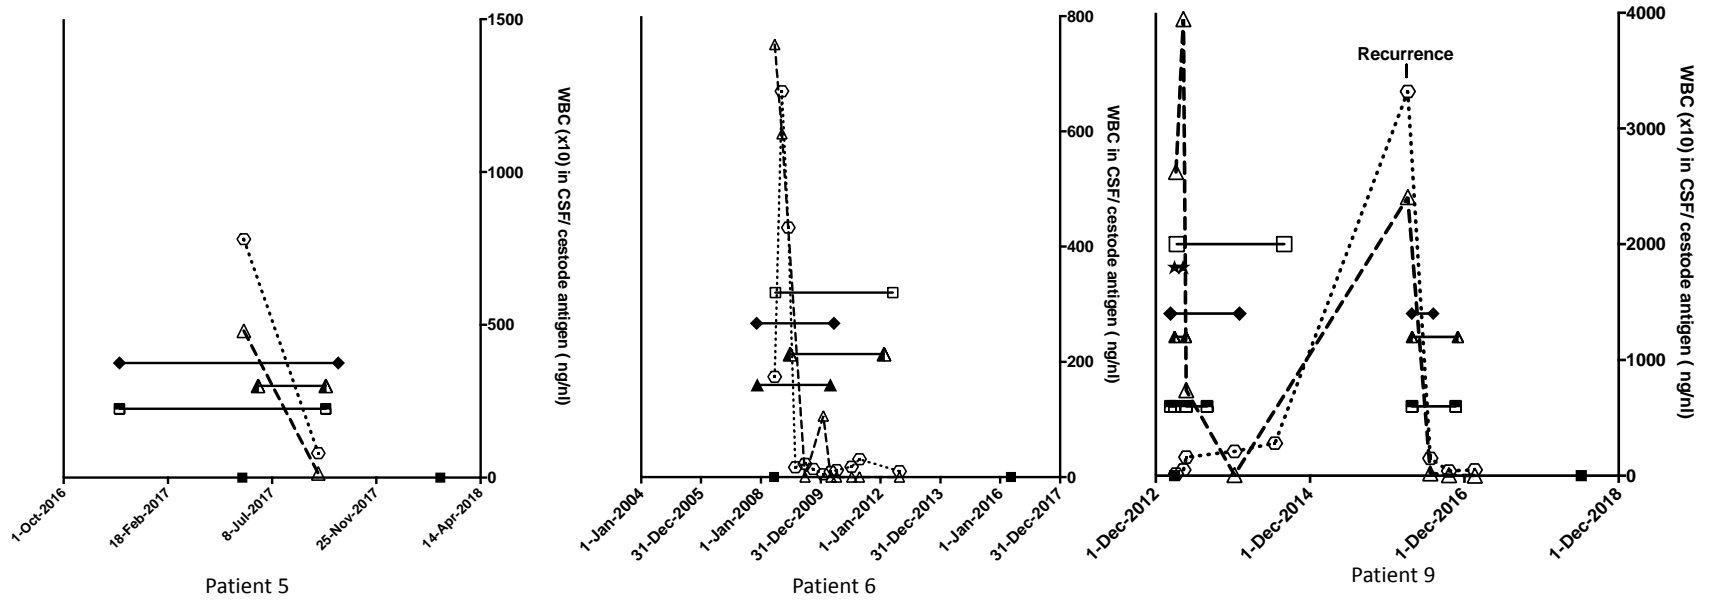

Supplemental Figure 5. Course of infection, treatment and follow up

- Enrolled NIH
- Albendazole
- ▲ Praziquantel
- ◆ Steroids
- ▣ Methotrexate
- ★ Etanercept
- ⊙ CSF WBC
- △ Cestode antigen CSF

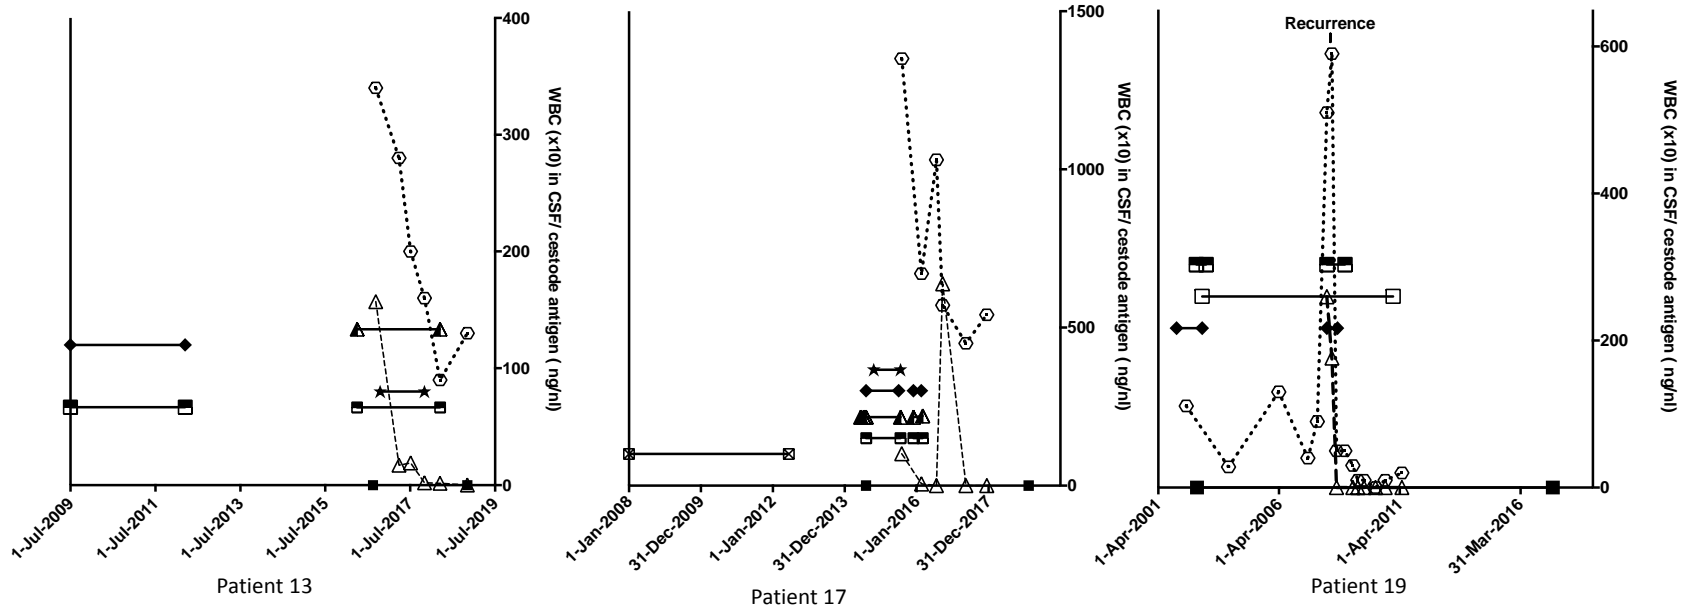

Supplemental Figure 6. Course of infection, treatment and follow up

- Enrolled NIH
- Albendazole
- ▲ Praziquantel
- ◆ Steroids
- ▣ Methotrexate
- ★ Etanercept
- CSF WBC
- △ Cestode antigen CSF

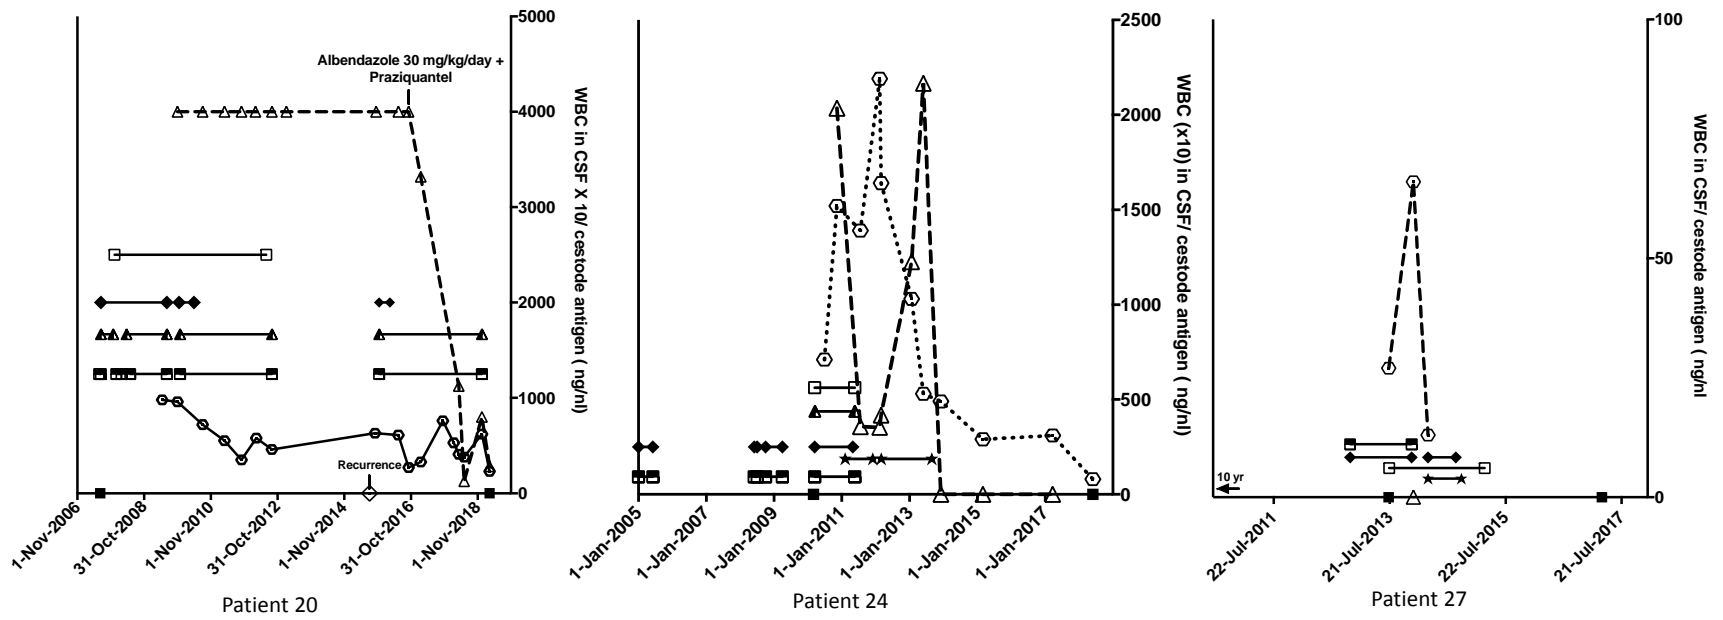

Supplemental Figure 7. Course of infection, treatment and follow up

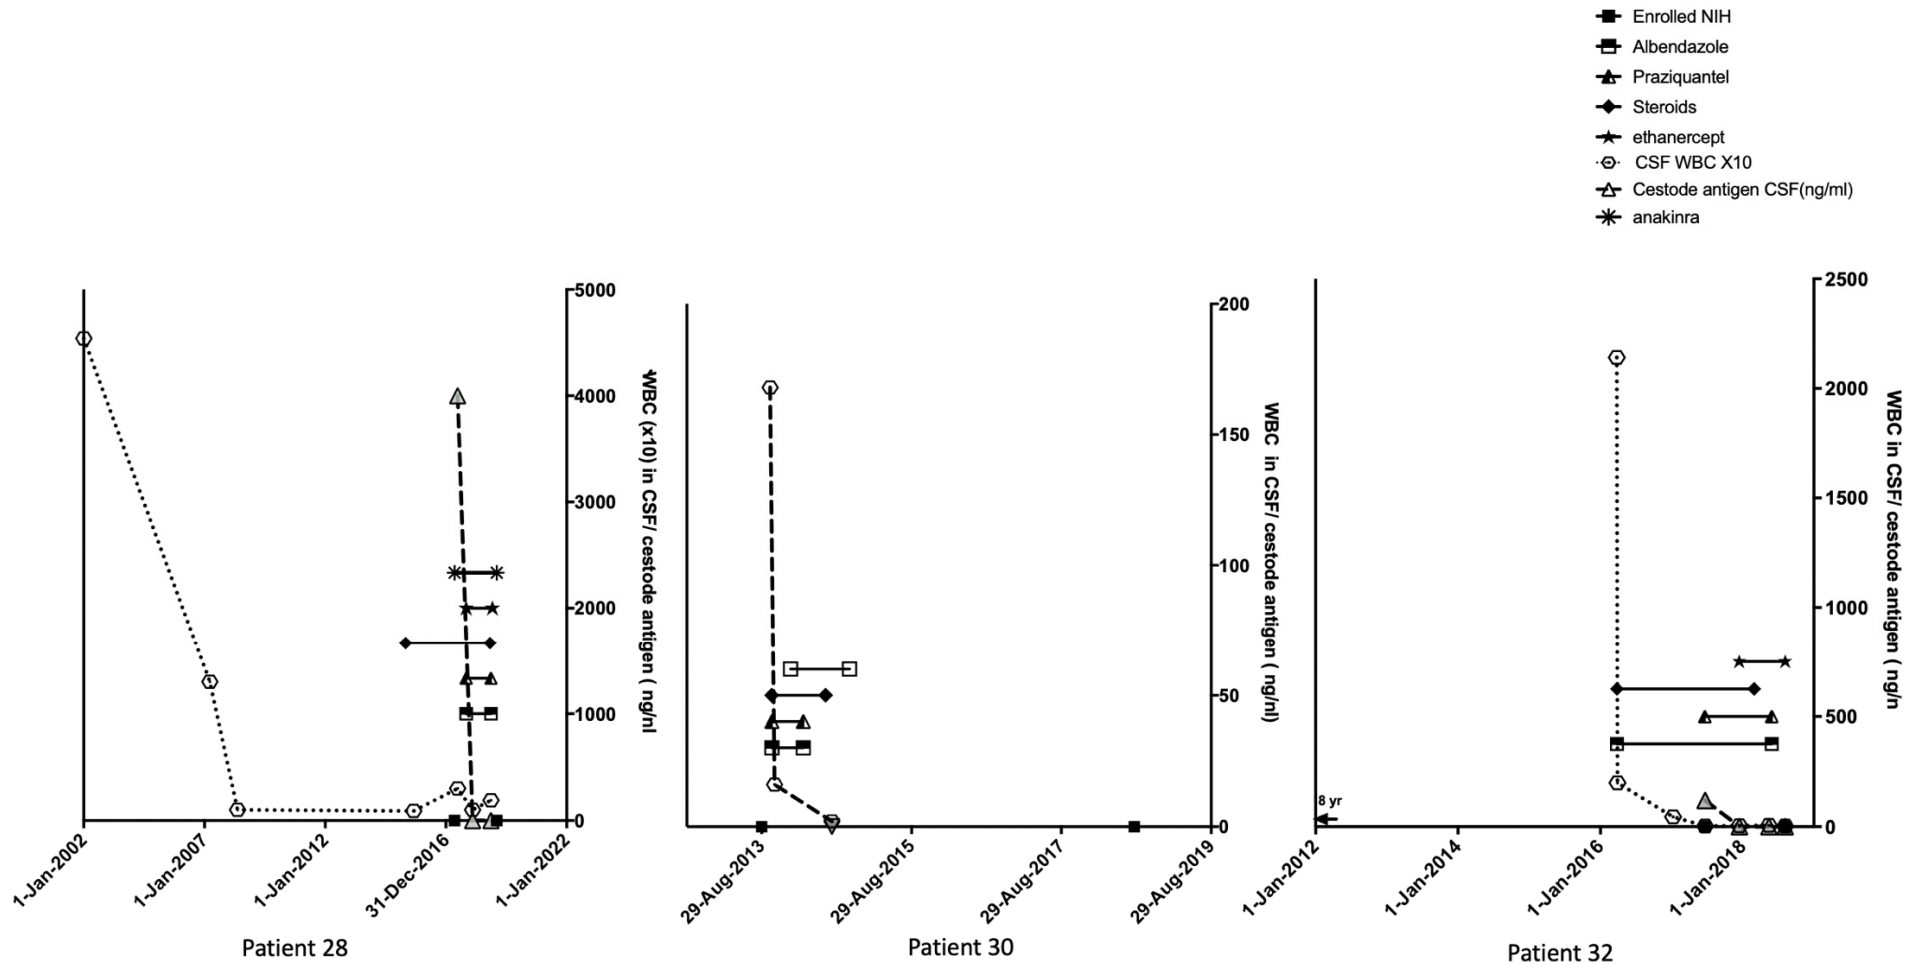

Supplemental Figure 8. Course of infection, treatment and follow up.

- Enrolled NIH
- ▣ Albendazole
- ▲ Praziquantel
- ◆ Steroids
- ▤ Methotrexate
- ★ Etanercept
- ⊙ CSF WBC
- ▲ Cestode antigen CSF

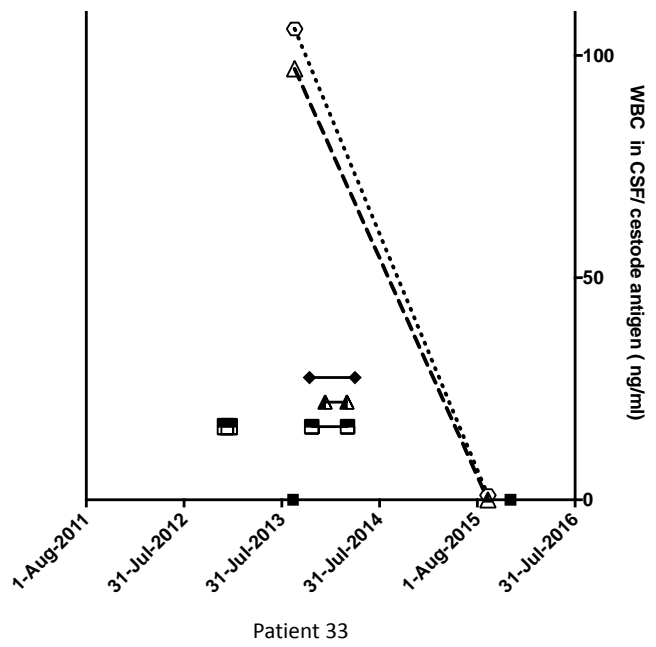

Supplemental Figure 9. Course of infection, treatment and follow up
